# Supplementary material for: Structural basis of HIV-1 Vif-mediated E3 ligase targeting of host APOBEC3H
Source: PubMed Central journal article supplement (PMC10462622; doi:10.1038/s41467-023-40955-x), 2023-08-28
Supplement: 41467_2023_40955_MOESM3_ESM.pdf [file 41467_2023_40955_MOESM3_ESM.pdf]

**File name: Supplementary Movie 1**

Description: Cryo-EM map of the A3H-VCBCC complex and its superimposition with the corresponding atomic model.

**File name: Supplementary Movie 2**

Description: Cryo-EM structure of the A3H-VCBCC complex highlighting the A3H-Vif interface around A3H  $\alpha$ 3 and  $\alpha$ 4.

**File name: Supplementary Movie 3**

Description: Surface electrostatic potential of the A3H-VCBCC complex highlighting the A3H-Vif interface.
